# Supplementary material
Source: Research Square preprint supplement (doi:10.21203/rs.3.rs-10009104/v1)
Supplement: Supplementary file 1 [file 21f6286889b838c7fa63387a.docx]

| **Group number and name** | **Color** | **Description** |
| --- | --- | --- |
| Priority 1: Emergent health or social needs | Red | Individuals presenting with *acute or uncontrolled medical conditions* (e.g., severe hypertension, diabetes with complications, seizure disorders, acute infections) or significant *social vulnerabilities* (e.g., pregnancy without prenatal care, complex disability, unaccompanied minors, or mental health crises).  These clients were scheduled for primary care or RHA assessment **within 7 days of arrival.** Medical escorts conducted direct handoff calls to the RIHH team upon airport arrival to ensure safe handoff and appropriate triage (i.e. Emergency room assessment vs. Prompt primary care RHA). |
| Priority 2: Urgent health or social needs | Yellow | Refugees with *non-critical chronic conditions* (e.g., well-controlled hypertension, asthma, or musculoskeletal issues, tuberculosis classification) or those requiring ongoing preventive or specialty follow-up were categorized as Priority 2. These individuals were referred for evaluation **within 30 days of arrival**, allowing time for appropriate scheduling and coordination with primary care RHA providers. |
| Priority 3: Routine, Preventative and General Health needs | Green | Individuals with *no immediate medical concerns* or those requiring only *routine screening and vaccination updates* were placed in this category. Priority 3 cases were typically connected to care **within 90 days of arrival.** For school-aged children, New York State requires immunizations within 30 days of school entry; therefore, children in this category were linked with the OCHD Immunization Clinic to receive necessary vaccinations while awaiting their scheduled Refugee Health Assessment (RHA). This ensured timely school enrollment. |

**Table 1: RIHH Medical Priority Levels and Referral Timelines for Newly Arrived Refugees**
This table outlines the three-tier RIHH medical prioritization system used to stratify newly arrived refugees by medical urgency and care needs. Priority levels guide referral timelines, intensity of follow-up, and coordination between the health department, resettlement agencies, and primary care RHA providers.
